# **Targeting CoV-2 Spike RBD and ACE-2 Interaction with Flavonoids of Anatolian Propolis by *in silico* and *in vitro* Studies in terms of possible COVID-19 therapeutics**

**Halil Ibrahim GULER<sup>1\*</sup>, Fulya AY SAL<sup>2</sup>, Zehra CAN<sup>3</sup>, Yakup KARA<sup>4</sup>, Oktay YILDIZ<sup>5</sup>, Ali Osman BELDUZ<sup>2</sup>, Sabriye ÇANAKCI<sup>2</sup>, Sevgi KOLAYLI<sup>4</sup>**

<sup>1</sup>*Karadeniz Technical University, Faculty of Science, Department of Molecular Biology and Genetics, 61080 Trabzon, TURKEY*

<sup>2</sup>*Karadeniz Technical University, Faculty of Science, Department of Biology, 61080 Trabzon, TURKEY*

<sup>3</sup>*School of Applied Sciences, Bayburt University, Bayburt, TURKEY,*

<sup>4</sup>*Karadeniz Technical University, Department of Chemistry, Trabzon, TURKEY*

<sup>5</sup>*Karadeniz Technical University, Faculty of Pharmacy, Basic Pharmaceutical Sciences, Department of Biochemistry, 61080 Trabzon, TURKEY*

## **Corresponding author:**

Halil Ibrahim GULER

hiboguler@gmail.com, +90462 377 3553

ORCID: 0000-0002-7261-6790

## **Conflict of interest**

No conflict of interest is declared.

**Running Title:** Propolis and Covid-19 treatment

## ABSTRACT

Propolis is a multi-functional bee product with a rich in polyphenols. In this study, the inhibition effect of Anatolian propolis against SARS coronavirus-2 (SARS CoV-2) was investigated as *in vitro* and *in silico*. Raw and commercial of propolis samples were used in the study and it was found that both of were rich in caffeic acid, p-coumaric acid, ferulic acid, t-cinnamic acid, hesperetin, chrysin, pinocembrin and caffeic acid phenethyl ester (CAPE) by HPLC-UV analysis. The ethanolic propolis extracts (EPE) were used in the screening ELISA test against the spike S1 protein (SARS Cov-2): ACE-2 inhibition KIT for *in vitro* study. Binding energy constants of these polyphenols to the CoV-2 Spike S1 RBD and ACE-2 protein were calculated separately as molecular docking study using AutoDock 4.2 molecular docking software. In addition, pharmacokinetics and drug-likeness properties of these eight polyphenols were calculated according to the SwissADME tool. Binding energy constant of pinocembrin was found the highest for both receptors, followed by chrysin, CAPE and hesperetin. *In silico* ADME behavior of the eight polyphenol was found potential ability to work effectively as novel drugs. The findings of both studies showed that propolis has a high inhibitory potential against Covid-19 virus. However, further studies are needed.

**Key words:** Propolis, Covid-19, SARSCoV2, pinocembrin, docking, EDM

## 1. INTRODUCTION

The severe acute respiratory syndrome (SARS) coronavirus-2 (SARS CoV-2) is responsible for coronavirus (COVID-19) pandemic. Coronavirus family has seventh member that infect human beings after SARS coronavirus and Middle East respiratory syndrome (MERS) coronavirus (Bachevski et al. 2020; Zhu et al. 2020). Compared with other viruses, this virus has a high transmissibility and infectivity and is mostly spread by respiratory tracts. The virus is transmitted directly or indirectly, mostly through mucous membranes, nose, mouth and eyes. Until an effective vaccine or medicine is found, many physical and chemical solutions are used to protect against this virus. Mask, distance and hygiene are the most widely used physical protective agents. There are some natural food supplements and vitamins are used in strengthening the immune system. The most used of them are vitamins D, C and propolis.

Propolis is a resinous honeybee product obtained from beehives as raw. Honeybees collect propolis mostly from the leaves, barks and trunks of the trees, then transform it with some secretions and store it in the hive. Honeybees benefit from propolis in physical, chemical and biological aspects. They used it as antiseptic and antimicrobial, antiviral, antioxidant, antitumoral e.g. agents. Propolis has been also used extensively in traditional and complementary medicine for these wide biological activities (Król, et al. 2013; Pasupuleti et al. 2017). In the last 30 years, pharmacological and biochemical studies showed that propolis has wide biological active properties such as antibacterial, antiviral, anti-inflammatory, antitumoral, hepatoprotective, neuroprotective, enhanced immunity in apitherapeutic applications (Pasupuleti et al. 2017).

Although its composition and biological active properties depend on the flora of the area where it is collected, propolis consists of approximately 50% resin and balsam, 30% wax, and the rest of essential oils and aromatic compounds (Bankova et al. 2019; Kızıltas and Erkan, 2020). The active ingredients of propolis, which consists of approximately 300 different organic compounds, are various polyphenols and volatile compounds found in the balsamic part. Although propolis is partially extracted by dissolving in water, glycol, vegetable oils, the most ideal solvent is 60-70% ethanol (Oroian, et al. 2020). Today many different commercial propolis extracts are available in different forms such as drops, sprays, pills, pastil, etc. The higher polyphenols or flavonoids contained propolis samples are accepted the higher qualities (Oroion et al. 2020). Polyphenols are the biggest of phytochemical compounds, and polyphenol-rich diets have been associated with many health benefits. Studies are strongly supports that dietary polyphenols is used in the prevention of degenerative diseases, particularly cardiovascular, neurodegenerative and cancers diseases (Tsao, 2010; Pasupuleti et al. 2017).

Propolis is a good antimicrobial and antiviral natural mixture (Przybyłek and Karpiński, 2019). Many studies have been shown that propolis has an antiviral effect against various DNA and RNA viruses, such as HIV, *Herpes simplex*, HSV-1, HSV-2, *para*-influenza virus, influenza virus type A B, adenovirus, avian reovirus, Newcastle virus disease, bovine rotavirus, pseudo rabies virus etc. (Bachevskiet al. 2020; Bankova, et al: 2014). The oldest antiviral activity study of propolis against coronaviruses was conducted in 1990. In an *in vitro* study, only antiviral effects of five propolis flavonoids, chrysin, kaempferol, quercetin, acacetin and galangin were investigated. Among them, quercetin exhibited antiviral activity depending on the dose (Debiaggi et al. 1990).

In the COVID-19 pandemic, propolis and some bee products have renewed interest against SARS CoV-2 infection, and some molecular docking studies have confirmed this. *In silico* studies are reported that some of the active ingredients of propolis, especially some flavonoids, have a higher binding potential than the antiviral drugs (Hydroxychloroquine and Remdesivir) used in COVID-19 spike protein and ACE-2 (Mady, et al. 2020; Shaldam et al. 2020; Güler and Kara, 2020; Guler et al. 2020). In these studies, it has been shown that the active components of propolis have high binding potential to cellular Angiotensin-converting enzyme-2 (ACE-2) receptors of the S1 spike protein, serine protease TMPRSS2 and PAK1 signaling pathways (Beratta et al. 2020; Scorza, et al. 2020). A clinical study was conducted in which propolis tablets were administered in PCR-positive Covid-19 patients (400 and 8000 mg) (3x1) for 7 days together with placebo, the results showed that the propolis reduced hospitalization time (Silveira, et al. 2021). Propolis also have immunomodulatory, anti-thrombosis activities (Beratta et al. 2020). These activities are also very important in combating the virus. In addition, propolis has been to inhibit the systemic inflammatory response and protect hepatic and neuronal cells in acute septic shock (Korish, et al. 2011).

Although propolis is one of the most commonly used natural prophylactic agent during the pandemic, the scientific studies on propolis are insufficient. Therefore, in this study, the inhibition of Anatolian propolis against COVID-19 virus was investigated for the first time in terms of the spike S1 protein (SARS Cov-2): ACE-2 inhibitor screening ELISA test as an *in vitro* study.

## **2. MATERIALS AND METHODS**

### ***2.1 Chemicals***

ELISA KIT of COVID-19 spike protein: ACE-2 assay kit (Cat. No. 79954) was purchased from BPS Bioscience (79954), San Diego, USA gallic acid, protocatechuic acid p-OH benzoic acid, catechin, caffeic acid, syringic acid, epicatechin, p-coumaric acid, ferulic acid, rutin, myricetin, resveratrol, daidzein, luteolin, t-cinnamic acid, hesperedin, chrysin, pinocembrin, caffeic acid phenethyl ester (CAPE), FeSO<sub>4</sub>.7H<sub>2</sub>O, Folin-Ciocalteu's phenol, diethyl ether, ethyl acetate, acetonitrile were purchased from Sigma-Aldrich (Chemie, Munich, Germany). Daidzein from Cayman Chemical (Michigan, USA) and Ferric tripyridyltriazine (Fe-III-TPTZ), FeCl<sub>3</sub>, CH<sub>3</sub>CO<sub>2</sub>Na.3H<sub>2</sub>O, acetonitrile purchased from Merck (Darmstadt, Germany).

## ***2.2 Propolis samples***

Two different propolis samples were used in this study. Both propolis are samples of Anatolian flora, one was prepared from raw Anatolia propolis, the second was commercial Anatolia propolis. In order to obtain homogeneous Anatolian propolis sample (P1), propolis samples of seven different regions (Van, Rize, Zonguldak, Mugla, Antalya, Diyarbakır and Giresun) were mixed equally. 3 g of the powdered raw propolis was added 30 mL 70% ethanol and shaken on a shaker at a controlled speed for 24 hours (Heidolph Promax 2020, Schwabach, Germany), and ultrasonic (Everest Ultrasonic, Istanbul, Turkey) extraction have been applied for 30 min at 99% power adjustment, then the mixture was filtered through 0.2  $\mu\text{m}$  cellulose filters (Millipore, Bedford, MA, USA). The ethanolic propolis extract of the second samples elected among commercial propolis samples (P2), was supplied by Bee&You (Bee'O®) (SBS Scientific Bio Solutions Inc., Istanbul, Turkey). The commercial propolis extract is sold in pharmacies and is widely used for apitherapeutic purposes in Turkey.

## ***2.3 Characterization of the propolis samples***

### ***2.3.1 Total phenolic compounds (TPC)***

Total phenolic content of the both samples were measured with Folin-Ciocalteu's test using gallic acid (GA) as standard (Singleton et al. 1999). 20  $\mu\text{L}$  six different propolis extracts and standard samples dilutions (from 0.500 mg/mL to 0.015 mg/ml) and 0.2 N 400  $\mu\text{L}$  Folin reagents were mixed and completed to 5.0 ml with distilled water, then vortexed. After 3 min incubation, 400  $\mu\text{L}$  of  $\text{Na}_2\text{CO}_3$  (10%) was added and incubated at 25°C. The absorbance was measured at 760 nm after 2 h incubation. The total phenolic content was expressed in mg GAE/mL using a standard curve.

### ***2.3.2 Total Flavonoid Content (TFC)***

Total flavonoid concentrations of the propolis samples were measured by spectrophotometric method using quercetin standard (Fukumoto & Mazza, 2000). 250  $\mu\text{L}$  of different propolis extracts and standard dilutions (from 0.500 mg/mL to 0,015 mg/ml), 50  $\mu\text{L}$  mL of 10%  $\text{Al}(\text{NO}_3)_3$  and 50  $\mu\text{L}$  of 1 M  $\text{NH}_4\text{CH}_3\text{COO}$  was added and completed 3.0 mL with methanol (99%), vortexed and incubated at 25°C for 40 min. After incubation, the absorbance was then measured against a blank at 415 nm. The total flavonoid concentration was expressed in mg QUE/ml by the curve.

### **2.3.3 Determination ferric reducing/antioxidant power (FRAP)**

The total antioxidant capacities of the samples were determined by using Ferric reducing/antioxidant power assay (FRAP) (Benzie and Szeto 1999). Firstly, working FRAP reagent (Ferric tripyridyltriazine (Fe-III-TPTZ) was prepared. For this, it was freshly obtained by mixing 300 mM pH: 3.6 acetate buffer, 10 mM TPTZ and 20 mM FeCl<sub>3</sub> solutions in a ratio of (10: 1: 1). Before the samples test, a standard curve is prepared with 1000 µM stock FeSO<sub>4</sub>.7H<sub>2</sub>O solution by serial dilutions. 1.500 ml the FRAP reagent, 50 µL sample and 50 µL methanol were mixed and incubated for 4 min at 37°C, and the absorbance was read at 595 nm against a reagent blank containing distilled water. FRAP value was expressed in µmol FeSO<sub>4</sub>.7H<sub>2</sub>O equivalents/mL.

### **2.3.4 Determination of phenolic compositions by HPLC-UV**

For preparation of the propolis extracts for chromatographic analysis, 10 ml of ethanolic extracts were evaporated and the residue dissolved using 10 ml of purified water of pH 2. The aqueous solution was extracted three times with 5 ml of diethyl ether (15 min, 200 rpm, 25 °C) and three times with ethyl acetate (15 min, 200 rpm, 25 °C). The organic phase, which was collected in a flask after each extraction, was evaporated. The residue was dissolved in 2 mL of methanol and filtered 0.45 µm filters and given to HPLC device for analysis. The phenolic content analysis of the samples was done in triplicate.

Phenolic content analysis of the samples was performed with 280 nm wavelength in RP-HPLC system (EliteLaChrome; Hitachi, Tokyo, Japan) with C18 column (150 mm \* 4.6 mm, 5 µm; fortis). In the analysis using 70% acetonitrile/water (A) and 2% acetic acid/water (B) as mobile phase, the injection volume was 20 µl, the flow rate was 1.00 ml/min and the column temperature was 30 °C. The analysis was done using a gradient program. The R<sup>2</sup> values of the calibration curves of the nineteen standard phenolic compounds used in the analysis were between 0.998 and 1.000.

### **2.4 Inhibition Assay for Covid-19**

The Spike S1 (SARS CoV-2): ACE-2 inhibitor scanning colorimetric assay kit (Cat. No. 79954) was purchased from BPS Bioscience (79954), San Diego, USA. The colorimetric test is designed for screening and profiling inhibitors of this interaction. The aim of the test is to prevent the virus from being entering the cell by preventing the interaction between Spike protein S1 and ACE-2. Using the kit protocol, the absorbance was read at 450 nm using UV/Vis spectrophotometer microplate reader. The propolis and standard phenolic samples

were diluted with 70% ethanol and the Covid-19/ELISA test procedure was applied. All tests were done in triplicate.

## ***2.5 Molecular Docking Studies***

Autodock 4.2 software for performing Molecular docking studies was used to investigate the possible interactions of eight ligands and reference molecule with the target proteins. To evaluate the prediction of accuracy of binding affinity between ligands and two target proteins, the binding free energies ( $\Delta G$ ) are calculated for the crystal structures and the docking mod. The 3-D structure of all ligands (pinocembrin, chrysin, cape, hesperetin, ferulic acid, t-cinnamic acid, p-coumaric acid, caffeic acid) and reference molecule (Hydroxychloroquine) were retrieved from the PubChem database (<https://pubchem.ncbi.nlm.nih.gov/>) as sdf format and then converted to pdb format by using BIOVIA DS Visualizer software (Dassault Systèmes BIOVIA, 2016). 2D structure of all ligands used in the present study is given in figure 1. The 3-dimensional structure of ACE-2 (PDB ID: 6M0J, Res: 2.45 Å, Chain:A) and SARS-Coronavirus-2 spike protein (PDB ID: 6YLA, Res: 2.42 Å, Chain:A) were downloaded from RCSB Protein Data bank (<http://www.rcsb.org/pdb>). The prepared nine ligands and two receptor proteins were used as input files for AutoDock 4.2 software (Morris et al., 2009). Possible docking modes between molecules and target proteins were studied using the AutoDock 4.2 software and Lamarckian genetic algorithm was employed for all docking simulations. After energy minimization, the protein structures were prepared for docking by eliminating molecules of water, ions and other ligands, and by the addition of polar atoms of hydrogen, respectively, which were then converted to PDBQT files used for docking. The standard docking procedure was used. For this, the target proteins were kept rigid while the all ligands were kept flexible. The entire ACE-2 and SARS-Cov-2 spike protein was centered to cover with a grid box of dimension 126Å X 126Å X 126 Å with grid spacing 0.375 Å. The default settings were applied for all other parameters. The program was run for a total number of 100 Genetic algorithm runs. Results of the molecular docking described the affinity represented by docking score and binding interaction (hydrogen/hydrophobic) of each ligand on the respective protein target. The binding energies of nine docked conformations of each ligand against the target proteins were analyzed using BIOVIA Discovery Studio Visualizer 2018 (Dassault Systèmes BIOVIA, 2016). The conformations with high negative binding energy are shown in the figures 2-9.



## ***2.6 Pharmacokinetics and drug-likeness properties (ADME Prediction)***

In order for a drug to be effective, it must reach its target in the body in sufficient concentration and remain in bioactive form long enough for the expected biological events to occur there. Drug development involves absorption, distribution, metabolism and excretion (ADME) increasingly earlier stage in the discovery process, at a stage where the compounds are abundant but access to physical samples is limited (Daina et al., 2017). Pharmacokinetics, drug-likeness and medicinal chemistry properties of eight ligands were predicted using the Swiss ADME server. Important parameters related to ADME properties, such as Lipinski's five rules, drug solubility, pharmacokinetic properties, molar refraction and drug likeliness were analyzed. The SMILES format retrieved from PubChem Database of the interested ligands were used as input for analysis tool (Daina et al., 2017).

## ***2.7 Statistical analyses***

The statistical evaluations were carried out with the SPSS Statistic 11.5 (IBM SPSS Statistics, Armonk, New York, USA). For presenting the results, descriptive statistics were used as mean  $\pm$  SD. The correlation analyses were performed with Mann–Whitney U-test. The significance was determined at  $p < 0.05$ .

## **3. RESULTS AND DISCUSSION**

### ***3.1 Propolis analyses***

Table 1 shows analysis of the two Anatolian propolis samples. The ethanolic propolis extracts, one was prepared from raw Anatolia propolis (P1) and the other was commercially available (P2). The characteristics of two propolis samples were analyzed in terms of pH, total phenolic substance, total flavanoid substance and total antioxidant capacity parameters. The pH values of both propolis samples were between 4.50 and 4.80, both of the found acidic. Propolis extracts are always expected to be acidic, this is due to various organic acids in their natural structures. Gallic acid, caffeic acid, coumaric acid, ferulic acid and syringic acid, protocatechuic acid are major phenolic acids in propolis samples (Yeo et al. 2015).

The total phenolic substance was found to be 12.30 mgGAE /mL in P1 sample and 40.68 mg GAE/ml in P2 sample. It was found that commercial sample (P2) has 3 times higher phenolic compound (P2). The main reason for this huge difference is the amount of the raw propolis used initially when extracting with ethanol. In the P1 sample, 3 g of raw propolis was prepared at a ratio of 1:10 in 30 mL 70% alcohol. However, since the P2 sample is commercial, it is not known how much raw propolis is used; it is only possible to say that it is



used in higher amounts than P1 sample. In short, the extract prepared with a high amount of raw propolis is expected to have a higher amount of phenolic matter. However, the quality of raw propolis used in extraction is also important (Yeo et al. 2015). It has been reported that total polyphenol content (TPC) in Anatolian raw propolis samples varied between 115 mgGAE/g and 210 mg GAE/g (Aliyazıcıoğlu et al. 2011). It was reported that TPC is varied from 55.75 to 91.32 mgGAE/g in Brazilian propolis (Andrade et al. 2017) and TPC was varied from 10 to 80 mgGAE/g in Azerbaijan propolis (Zehra et al. 2015).

Similar to the total amount of phenolic content, the amount of total flavanoid substance was found to be different in both samples, and it was found to be 12.40 mg / mL in the commercial sample and 1.04 mg / mL in the P1 sample. Flavonoids are the most common and the largest plant polyphenolic obtained from the everyday plant-source diet (Chun et al. 2007), and have been proven to be responsible for a variety of biological activities such as antioxidant, antibacterial, antiviral and anti-inflammatory activity. Amount of flavonoids taken in the daily diet was estimated to be about 200 mg /day, and it consisted of 84% flavan-3-ols, flavanones (7.6%), flavonols (7%), anthocyanidins (1.6%), flavones (0.8%) and isoflavones (0.6%). However, epidemiological studies conducted in populations fed with flavonoid-rich diets have shown that the incidence of cardiovascular damage and some types of it has decreased (Cui et al. 2008). It has been supported by studies that propolis is a very good source of flavonoids (Venkateswara et al. 2017; Kowacz and Pollack, 2020). Thus, high polyphenols and flavonoids are taken together with consumption of propolis as a food supplement.

The antioxidant capacity of propolis extracts was measured according to the FRAP test, and this test is a very simple and robust test that shows the total antioxidant capacity. The higher the FRAP value in the analysis measured according to the reduction ability of the Fe (III) TPTZ complex, the higher the antioxidant capacity (Can et al. 2015). It was determined that the antioxidant capacity of commercial propolis sample (P2) was approximately 2 times higher than the other sample (P1) and this was directly proportional to the total amount of polyphenol.

HPLC-UV analysis data for 19 standard phenolic compounds are given in table 2. Caffeic acid, *p*-coumaric acid, ferulic acid, *t*-cinnamic acid, hesperetin, chrysin, pinocembrin and CAPE were found to be rich in both propolis samples.

### **3.2 Molecular Docking Studies**

Molecular docking is a crucial tool for exploring the interactions between the target protein and a small molecule. The binding energy (kcal/mol) data allows us to study and compare the binding affinity of different ligands/compounds with their corresponding target receptor molecule. The lower binding energy indicates a higher affinity of the ligand for the receptor. The ligand with the highest affinity can be selected as a potential drug for further studies. For this study, eight flavonoids with a broad range of biological activities, along with hydroxychloroquine which exhibited efficacy against SARS-CoV-2, have been selected as ligands to investigate their binding affinities with SARS-CoV-2 Spike Protein RBD and ACE-2 as target receptor proteins. All the eight polyphenol and one reference molecule were individually docked to the ACE-2 and SARS CoV-2 Spike RBD, respectively. After successful docking of all the ligands used in these docking experiments, the results showed us significant interactions of the ligands with the target receptors. Four ligands (pinocembrin, chrysin, CAPE, hesperetin) are bound to the target protein ACE-2 more effectively than the reference molecule. And also, seven ligands (pinocembrin, chrysin, hesperetin, CAPE, ferulic acid, t-cinnamic acid, caffeic acid) given in figure 1 are bound stronger to the SARS CoV-2 spike RBD than the reference molecule, hydroxychloroquine. From the table 3, it can be clearly predicted that pinocembrin has the highest binding energy value of -8.58 kcal/mol for ACE-2 protein and -7.54 kcal/mol for SARS CoV-2 Spike RBD, followed by chrysin owing dock scores of -8.47 and -7.48 kcal/mol, respectively. Details about estimated binding affinities (Kcal/mol) and  $K_i$  values of docked ligands are shown in the table 3. The docked poses, interacting residues and interactions of each ligand with ACE-2 and SARS CoV-2 Spike RBD are given in figures 2-9.

### **3.3 Pharmacokinetics and drug-likeness properties (ADME Prediction)**

Generally, some parameters are used to evaluate potential interactions between drug and other non-drug target molecules (Das et al., 2020; Gupta et al., 2020; Jayaram et al., 2012; Lipinski, 2004). The propensity for a compound with a certain pharmacological or biological activity to be used as a potential drug is evaluated. The rule essentially determines the molecular properties of a compound that are its primary requirement for being a potential drug, such as absorption, distribution, metabolism, and excretion (ADME). According to Lipinski, a compound to be used should have 5 properties to be selected as a potential drug. These are: (a) Molecular mass <500 Daltons (b) high lipophilicity (expressed as LogP 5) (c) less than 5

hydrogen bond donors (d) less than 10 hydrogen bond acceptors (e) molar refractivity between 40 and 130. Screened eight flavonoid compounds used in this study were found to all pass the Lipinski's rule of five (table 4). And also, other properties like pharmaco-kinetic, physicochemical and drug-likeness properties are given in table 4. Hence, we suggest that all of eight molecules have the potential to work effectively as novel drugs.

### ***3.4 In vitro inhibition studies***

The binding of ACE-2 protein to SARS CoV-2 Spike S1 protein was studied for both EPEs with the inhibitor screening colorimetric assay kit (BPS Bioscience, 79954). The key to this ELISA assay is the high sensitivity of detection of ACE-2-Biotin protein by Streptavidin-HRP. This technique is based on the binding of the active ingredients of the propolis to this spike S1 protein/ACE-2 complex and preventing the binding of the enzyme-labeled second antibody to the protein. The presence of enzyme activity (horseradish peroxidase) indicates the absence of binding. The inhibition values are expressed in terms of the  $IC_{50}$  value, and are expressed as the amount of the propolis that provides 50% inhibition. The data are shown in figures 10-11. Together with the propolis samples, ability of certain flavonoids to inhibit the interaction of SARS CoV-2 S1 spike protein and ACE-2 were also tested. It was found that the two EPE samples studied were found to cause inhibition of interaction of SARS CoV-2 S1 spike protein: ACE-2 receptors and the degree of inhibition ( $IC_{50}$ ) varied depending on the propolis concentration. The  $IC_{50}$  value of the commercial propolis was found to be about 3 times higher than P1 sample. The main reason for this is thought to be that the commercial propolis sample is more concentrated. It is necessary to perform an inhibition test for each polyphenol to understand from which compound or compounds cause inhibition. Since the 96-well plate has limited spaces, only major flavonoids (pinocembrin, CAPE, hesperetin) were tested in the study. It has been found that three flavonoids were found to exhibit different inhibition values against the virus, of which hesperetin was the most effective (16.88 mM), followed by pinocembrin (29.53 mM). When comparing *in silico* study results with *in vitro* study results, it is seen that pinocembrin, hesperetin and CAPE have high binding affinities to virus spike S1 protein and ACE-2 receptor. So, *in silico* and *in vitro* studies support each other. In addition, the fact is that the phenolic standards used in terms of ADME properties were found to have high drug properties and the results proved that propolis has high potential in combating the Covid-19.

#### 4. CONCLUSION

In this study, it was shown for the first time that ethanolic Anatolia propolis extracts inhibit Covid-19 virus in terms of binding spike S1 protein and ACE-2 receptor as both *in vitro* and *in silico* studies. However, more detailed studies are needed.

#### Acknowledgments

This work was supported by the KTU BAP FBA-2020-9192 project. We thank (Bee&You (Bee'O®) (SBS Scientific Bio Solutions Inc., Istanbul, Turkey) company for allowing the use of commercial propolis sample.

#### References

- Aliyazıcıoğlu, R., Sahin, H., Erturk, O., Ulusoy, E., Kolaylı, S. 2013. Properties of phenolic composition and biological activity of propolis from Turkey. *Int. J Food Pro.* 16, 277–287.
- Andrade, J. K. S., Denadai, M., de Oliveira, C. S., Nunes, M. L., & Narain, N. (2017). Evaluation of bioactive compounds potential and antioxidant activity of brown, green and red propolis from Brazilian northeast region. *Food Research International*, 101, 129-138.
- Bachevski, D., Damevska, K., Simeonovski, V., & Dimova, M. (2020). Back to the basics: Propolis and COVID-19. *Dermatologic Therapy*, 33 (4), e13780.
- Bankova, V., Bertelli, D., Borba, R., Conti, B. J., da Silva Cunha, I. B., Danert, C., .. &Zampini, C. (2019). Standard methods for *Apis mellifera* propolis research. *Journal of Apicultural Research*, 58(2), 1-49.
- Bankova, V., Galabov, A. S., Antonova, D., Vilhelmova, N., & Di Perri, B. (2014). Chemical composition of Propolis Extract ACF® and activity against herpes simplex virus. *Phytomedicine*, 21(11), 1432-1438.
- Benzie, I.F.F.; Strain, J.J. Ferric Reducing/Antioxidant Power Assay: Direct measure of total antioxidant activity of biological fluids and modified version for simultaneous measurement of total antioxidant power and ascorbic acid concentration. *Methods in Enzym.* 1999, 299, 15–27.
- Berretta, AA, Silveira, MAD, Capcha, JMC & De Jong, D. 2020. Propolis and its potential against SARS-CoV-2 infection mechanisms and COVID-19 disease, *Biomedicine & Pharmacotherapy*, 110622.

- ÇAKIR, H. E., Şirin, Y., KOLAYLI, S., & Zehra, C. A. N. (2018). Validation methods for phenolic components with RP-HPLC-UV in various bee products. *Apiterapive Doğa Dergisi*, 1(1), 13-19.
- Çakir, HE.,Şirin, Y., Kolayli, S., Can, Z. 2018.Validation methods for phenolic components.
- Can, Z., Yildiz, O., Sahin, H., Turumtay, E. A., Silici, S., &Kolayli, S. (2015). An investigation of Turkish honeys: their physico-chemical properties, antioxidant capacities and phenolic profiles. *Food Chemistry*, 180, 133-141.
- Chun, O. K., Chung, S. J., & Song, W. O. (2007). Estimated dietary flavonoid intake and major food sources of US adults. *The Journal of nutrition*, 137(5), 1244-1252.
- Cui, Y., Morgenstern, H., Greenland, S., Tashkin, D. P., Mao, J. T., Cai, L., ...& Zhang, Z. F. (2008). Dietary flavonoid intake and lung cancer-A population-based case-control study. *Cancer*, 112(10), 2241-2248.
- Daina, A., Michielin, O., &Zoete, V. (2017). Swiss ADME: a free web tool to evaluate pharmacokinetics, drug-likeness and medicinal chemistry friendliness of small molecules. *Scientific reports*, 7, 42717.<https://doi.org/10.1038/srep42717>
- Das, S., Sarmah, S., Lyndem, S., &Singha Roy, A. (2020). An investigation into the identification of potential inhibitors of SARS-CoV-2 main protease using molecular docking study. *Journal of Biomolecular Structure and Dynamics*, 1–11. <https://doi.org/10.1080/07391102.2020.1763201>
- Dassault Systèmes BIOVIA, Discovery Studio Modeling Environment, Release 2017, San Diego: Dassault Systèmes, 2016
- Debiaggi, M, Tateo, F, Pagani, L, Luini M & Romero E 1990. 'Effects of propolis flavonoids on virus infectivity and replication'. *Microbiologica*. vol. 13 , no. 3, pp. 207-213.
- Fukumoto L.R., Mazza G.,2000. Assessing antioxidant and prooxidant activities of phenolic compounds. *Journal Agriculture Food Chemistry*, 48, 3597-3604.
- Güler, H. İ. and Kara Y. Targeting CoV-2 Spike RBD: ACE-II complex with phenolic compounds from *Cistus (Cistus L.)* Bee Pollen for COVID-19 treatment by Molecular Docking Study. *Apiterapive Doğa Dergisi*, 3(1), 10-23.
- Güler, H. I., Tatar, G., Yildiz, O., Belduz, A. O., &Kolayli, S. (2020). An investigation of ethanolic propolis extracts: Their potential inhibitor properties against ACE-II receptors for COVID-19 treatment by Molecular Docking Study. *ScienceOpen Preprints*.
- Gupta, M. K.,Vemula, S., Donde, R., Gouda, G., Behera, L., &Vadde, R. (2020). In-silico approaches to detect inhibitors of the human severe acute respiratory syndrome corona virus envelope protein ion channel. *Journal of Biomolecular Structure*.
- Jayaram, B., Singh, T., Mukherjee, G., Mathur, A., Shekhar, S., &Shekhar,V. (2012). Sanjeevini: A freely accessible web-server for target directed lead molecule discovery. *BMC Bioinformatics*, 13 (Suppl 17), S7. <https://doi.org/10.1186/1471-2105-13-S17-S7>

- Kiziltas, H., & Erkan, C. (2020). The effects of different beehives on propolis production and quality. *Food Science and Technology*, (AHEAD).
- Korish, A. A., & Arafa, M. M. (2011). Propolis derivatives inhibit the systemic inflammatory response and protect the patic and neuronal cells in acute septic shock. *The Brazilian Journal of Infectious Diseases*, 15(4), 332-338.
- Kowacz, M., & Pollack, G. H. (2020). Propolis-induced exclusion of colloids: Possible new mechanism of biological action. *Colloid and interface science communications*, 38, 100307.
- Król, W., Bankova, V., Sforcin, J. M., Szliszka, E., Czuba, Z., & Kuropatnicki, A. K. (2013). Propolis: properties, application, and its potential.
- Lipinski, C. A. (2004). Lead- and drug-like compounds: The rule-of-five revolution. *Drug Discov Today Technol*, 1(4), 337–341. <https://doi.org/10.1016/j.ddtec.2004.11.007>.
- Mady, F. M., Sarhan, H. A., Rateb, H. S., & Alaaeldin, E. (2020). Optimization and Evaluation of Propolis liposomes as a promising therapeutic approach for COVID-19. *International journal of pharmaceutics*, 120028.
- Malkoç, M., Çakir, H., Yakup, K. A. R. A., Zehra, C. A. N., & Kolayli, S. (2019). Phenolic composition and antioxidant properties of Anzer honey from black sea region of Turkey. *Uludağ Arıcılık Dergisi*, 19(2), 143-151.
- Morris, G.M., Huey, R., Lindstrom, W., Sanner, M.F., Belew, R.K., Goodsell, D.S., Olson, A.J. (2009). AutoDock4 and AutoDockTools4: Automated Docking with Selective Receptor Flexibility. *J Comput Chem.*, 30, 2785–2791.
- Oroian, M., Ursachi, F., & Dranca, F. (2020). Influence of ultrasonic amplitude, temperature, time and solvent concentration on bioactive compounds extraction from propolis. *Ultrasonics sonochemistry*, 64, 105021.
- Pasupuleti, V. R., Sammugam, L., Ramesh, N., & Gan, S. H. (2017). Honey, propolis, and royal jelly: a comprehensive review of their biological actions and health benefits. *Oxidative medicine and cellular longevity*, 2017.
- Przybyłek, I., & Karpiński, T. M. (2019). Antibacterial properties of propolis. *Molecules*, 24(11), 2047.
- Scorza, C. A., Gonçalves, V. C., Scorza, F. A., Fiorini, A. C., de Almeida, A. C. G., Fonseca, M. C., & Finsterer, J. (2020). Propolis and coronavirus disease 2019 (COVID-19): Lessons from nature. *Complementary Therapies in Clinical Practice*, 41, 101227.
- Shaldam, M. A., Yahya, G., Mohamed, N. H., Abdel-Daim, M. M., & Al Naggar, Y. (2020). In silico screening of potent bioactive compounds from honey bee products against COVID-19 target enzymes. *ChemRxiv*, 12644102, 1-18.
- Silveira, M. A. D., De Jong, D., dos Santos Galvão, E. B., Ribeiro, J. C., Silva, T. C., Berretta, A. A., ... & da Hora Passos, R. (2021). Efficacy of propolis as an adjunct treatment for hospitalized COVID-19 patients: a randomized, controlled clinical trial. *medRxiv*.

- Singleton V.L., Orthofer R. and Lamuela-Raventos R.M.(1999). Analysis of total phenols and other oxidation substrates and antioxidants by means of folin-ciocalteu reagent, *Methods in Enzymology*, 299, 152-178.
- Tsao, R. (2010). Chemistry and biochemistry of dietary polyphenols. *Nutrients*, 2(12), 1231-1246.
- Venkateswara Rao, P., Kiran, S. D. V. S., Rohini, P., & Bhagyasree, P. (2017). Flavonoid: a review on naringenin. *J. Pharmacogn. Phytochem*, 6, 2778-2783. with RP-HPLC-UV in various bee products. *Apiterapive Doğa Dergisi*, 1(1), 13-19.
- Yeo, K. L., Leo, C. P., & Chan, D. J. C. (2015). Ultrasonic enhancement on propolis extraction at varied pH and alcohol content. *Journal of Food Process Engineering*, 38(6), 562-570.
- Zehra, C., Yildiz, O., Şahin, H., Asadov, A., & Kolayli, S. (2015). Phenolic profile and antioxidant potential of propolis from Azerbaijan. *Mellifera*, 15(1), 16-28.
- Zhu, X., Ge, Y., Wu, T., Zhao, K., Chen, Y., Wu, B., ...& Cui, L. (2020). Co-infection with respiratory pathogens among COVID-2019 cases. *Virus research*, 285, 198005.



**Table 1.** Analysis of two Anatolian propolis samples

|    |                                 | pH              | Total Phenolic Content (mgGAE/mL) | Total Flavanoid Content (mgQUE/mL) | Total Antioxidant Capacity (FRAP) $\mu\text{molFeSO}_4/\text{mL}$ |
|----|---------------------------------|-----------------|-----------------------------------|------------------------------------|-------------------------------------------------------------------|
| P1 | Raw Propolis (Prepared by self) | 4.80 $\pm$ 0.01 | 12.30 $\pm$ 0.02                  | 1.08 $\pm$ 0.03                    | 141.40 $\pm$ 1.70                                                 |
| P2 | Commercial Propolis (BEE'O)©    | 4.50 $\pm$ 0.01 | 40.68 $\pm$ 1.50                  | 12.40 $\pm$ 0.98                   | 285.40 $\pm$ 5.40                                                 |

**Table 2.** Phenolic profile of the EPE samples by HPLC-UV

| Phenolic Standards (mg/ 100 g) | Raw Propolis (P1) (Prepared by self) | Commercial Propolis (BEE'O)© (P2) |
|--------------------------------|--------------------------------------|-----------------------------------|
| Gallic acid                    | -                                    | -                                 |
| Protocatechuic acid            | -                                    | -                                 |
| <i>p</i> -OH Benzoic acid      | -                                    | -                                 |
| Catechin                       | -                                    | -                                 |
| Caffeic acid                   | 707.71                               | 497.27                            |
| Syringic acid                  | -                                    | -                                 |
| Epicatechin                    | -                                    | -                                 |
| <i>p</i> -Coumaric acid        | 881.89                               | 269.02                            |
| Ferulic Acid                   | 378.53                               | 145.77                            |
| Rutin                          | -                                    | -                                 |
| Myricetin                      | -                                    | -                                 |
| Resveratrol                    | -                                    | -                                 |
| Daidzein                       | -                                    | -                                 |
| Luteolin                       | -                                    | -                                 |
| <i>t</i> -Cinnamic acid        | 510.47                               | 51.75                             |
| Hesperetin                     | 711.06                               | 3029.46                           |
| Chrysin                        | 665.11                               | 1190.89                           |
| Pinocembrin                    | 1685.48                              | 1804.22                           |
| CAPE                           | 3268.72                              | 3168.26                           |

(-):not detected

**Table 3.** Summary of estimated binding affinity (kcal/mol) and  $K_i$  values of docked ligands against ACE2 and SARS-CoV-2 Spike receptor binding domain, and interacted residues in the binding sites.

| Receptor Name / PDB ID                                                                                         | Ligand Name                         | Binding Energy (kcal/mol) | $K_i$                                          | Interacted residues with ligand                                             |
|----------------------------------------------------------------------------------------------------------------|-------------------------------------|---------------------------|------------------------------------------------|-----------------------------------------------------------------------------|
| Angiotensin-Converting Enzyme-2 (ACE-2)<br>EC: <a href="#">3.4.17.23</a><br>/<br>6M0J (Chain A)<br>Res: 2.45 Å | Pinocembrin                         | -8.58                     | 510.99 nM                                      | Asn210, Leu9, Pro565, Ser563, Leu91, Val212, Val209                         |
|                                                                                                                | Chrysin                             | -8.47                     | 623.53 nM                                      | Asn210, Val212, Ser563, Glu564, Leu91, Leu95, Pro565, Val209                |
|                                                                                                                | CAPE (Caffeic acid phenethyl ester) | -8.42                     | 677.67 nM                                      | Asn437, Ile291, Thr434, Phe438, Pro415                                      |
|                                                                                                                | Hesperetin                          | -8.22                     | 943.94 nM                                      | Leu91, Ser63, Asn210, Asp206, Val209, Trp566, Val212, Glu564, Pro565, Leu95 |
|                                                                                                                | Ferulic acid                        | -5.65                     | 72.03 μM                                       | His540, Ile291, Pro289, Thr434, Glu430                                      |
|                                                                                                                | t-Cinnamic acid                     | -5.65                     | 72.06 μM                                       | Leu456, Trp477, Leu503, Trp165, Trp271, Lys481                              |
|                                                                                                                | p-coumaric acid                     | -5.63                     | 74.21 μM                                       | Trp165, Pro500, Leu503, Leu456, Trp477, Lys481, Trp271                      |
|                                                                                                                | Caffeic acid                        | -5.31                     | 127.93 μM                                      | Leu73, Ala99, Leu100, Lys74, Asn103                                         |
| SARS-CoV-2 Spike receptor binding domain<br>/<br>6YLA (Chain A)<br>Res: 2.42 Å                                 | *Hydroxychloroquine                 | -7.90                     | 1.61 μM                                        | Arg393, Phe390, Leu391, Asn394, His378, His401, Asp350                      |
|                                                                                                                | Pinocembrin                         | -7.54                     | 2.99 μM                                        | Asn448, Tyr449, Tyr451, Tyr495, Lys444, Phe497                              |
|                                                                                                                | Chrysin                             | -7.48                     | 3.29 μM                                        | Asn448, Tyr449, Phe497, Tyr495                                              |
|                                                                                                                | Hesperetin                          | -7.28                     | 4.63 μM                                        | Ile472, Asp467, Phe456, Arg457, Pro491, Lys458, Gln474                      |
|                                                                                                                | CAPE                                | -7.17                     | 5.54 μM                                        | Leu335, Phe338, Val367, Trp436, Gly339, Cys336                              |
|                                                                                                                | Ferulic acid                        | -6.93                     | 8.29 μM                                        | Leu441, Tyr495                                                              |
|                                                                                                                | t-Cinnamic acid                     | -6.64                     | 13.57 μM                                       | Phe497, Lys444, Asn448, Tyr449, Tyr495                                      |
|                                                                                                                | Caffeic acid                        | -6.43                     | 19.36 μM                                       | Leu441, Tyr495, Phe497                                                      |
| p-coumaric acid                                                                                                | -5.97                               | 42.06 μM                  | Phe497, Tyr495, Leu441                         |                                                                             |
| *Hydroxychloroquine                                                                                            | -6.32                               | 23.35 μM                  | Leu517, Tyr396, Val382, Phe392, Thr430, Phe515 |                                                                             |

\*reference molecule

**Table 4.** ADME properties of ligands docked with SARS-CoV-2 Spike RBD and ACE-2 target proteins

| Ligand name     | (Lipinski's Rule of Five) |      |              |                 |                    | Heavy atoms | Aromatic heavy atoms | Rotat. bonds | TPSA    | ESOL Class         | GI absorption | BBB permeant | Pgp substrate | Bio Avail. Score | PAINS alerts | Synthetic Accessibility | Violations | Drug Likeliness |
|-----------------|---------------------------|------|--------------|-----------------|--------------------|-------------|----------------------|--------------|---------|--------------------|---------------|--------------|---------------|------------------|--------------|-------------------------|------------|-----------------|
|                 | Mol. weight               | LogP | H-bond donor | H-bond acceptor | Molar Refractivity |             |                      |              |         |                    |               |              |               |                  |              |                         |            |                 |
| Pinocembrin     | 256.25                    | 2.26 | 2            | 4               | 69.55              | 19          | 12                   | 1            | 66.76 Å | soluble            | High          | Yes          | No            | 0.55             | 0            | 2.96                    | No         | Yes             |
| Chrysin         | 254.24                    | 2.5  | 2            | 4               | 71.97              | 19          | 16                   | 1            | 70.67 Å | moderately soluble | High          | Yes          | No            | 0.55             | 0            | 2.93                    | No         | Yes             |
| CAPE            | 284.31                    | 3.26 | 2            | 4               | 80.77              | 21          | 12                   | 6            | 66.76 Å | moderately soluble | High          | Yes          | No            | 0.55             | 1            | 2.64                    | No         | Yes             |
| Hesperetin      | 302.28                    | 1.91 | 3            | 6               | 78.06              | 22          | 12                   | 2            | 66.76 Å | soluble            | High          | No           | Yes           | 0.55             | 0            | 3.22                    | No         | Yes             |
| Ferulic acid    | 194.18                    | 1.36 | 2            | 4               | 51.63              | 14          | 6                    | 3            | 66.76 Å | soluble            | High          | Yes          | No            | 0.85             | 0            | 1.93                    | No         | Yes             |
| t-Cinnamic acid | 148.16                    | 1.79 | 1            | 2               | 43.11              | 11          | 6                    | 2            | 37.30 Å | soluble            | High          | Yes          | No            | 0.85             | 0            | 1.67                    | No         | Yes             |
| p-coumaric acid | 164.16                    | 1.26 | 2            | 3               | 45.13              | 12          | 6                    | 2            | 57.53 Å | soluble            | High          | Yes          | No            | 0.85             | 0            | 1.61                    | No         | Yes             |
| Caffeic acid    | 180.16                    | 0.93 | 3            | 4               | 47.16              | 13          | 6                    | 2            | 77.76 Å | very soluble       | High          | Yes          | No            | 0.56             | 1            | 1.81                    | No         | Yes             |

**Lipinski's Rule of Five:** Molecular weight (<500 Da), LogP (<5) , H-bond donor (<5), H-bond acceptor (<10), Molar Refractivity (40-130)

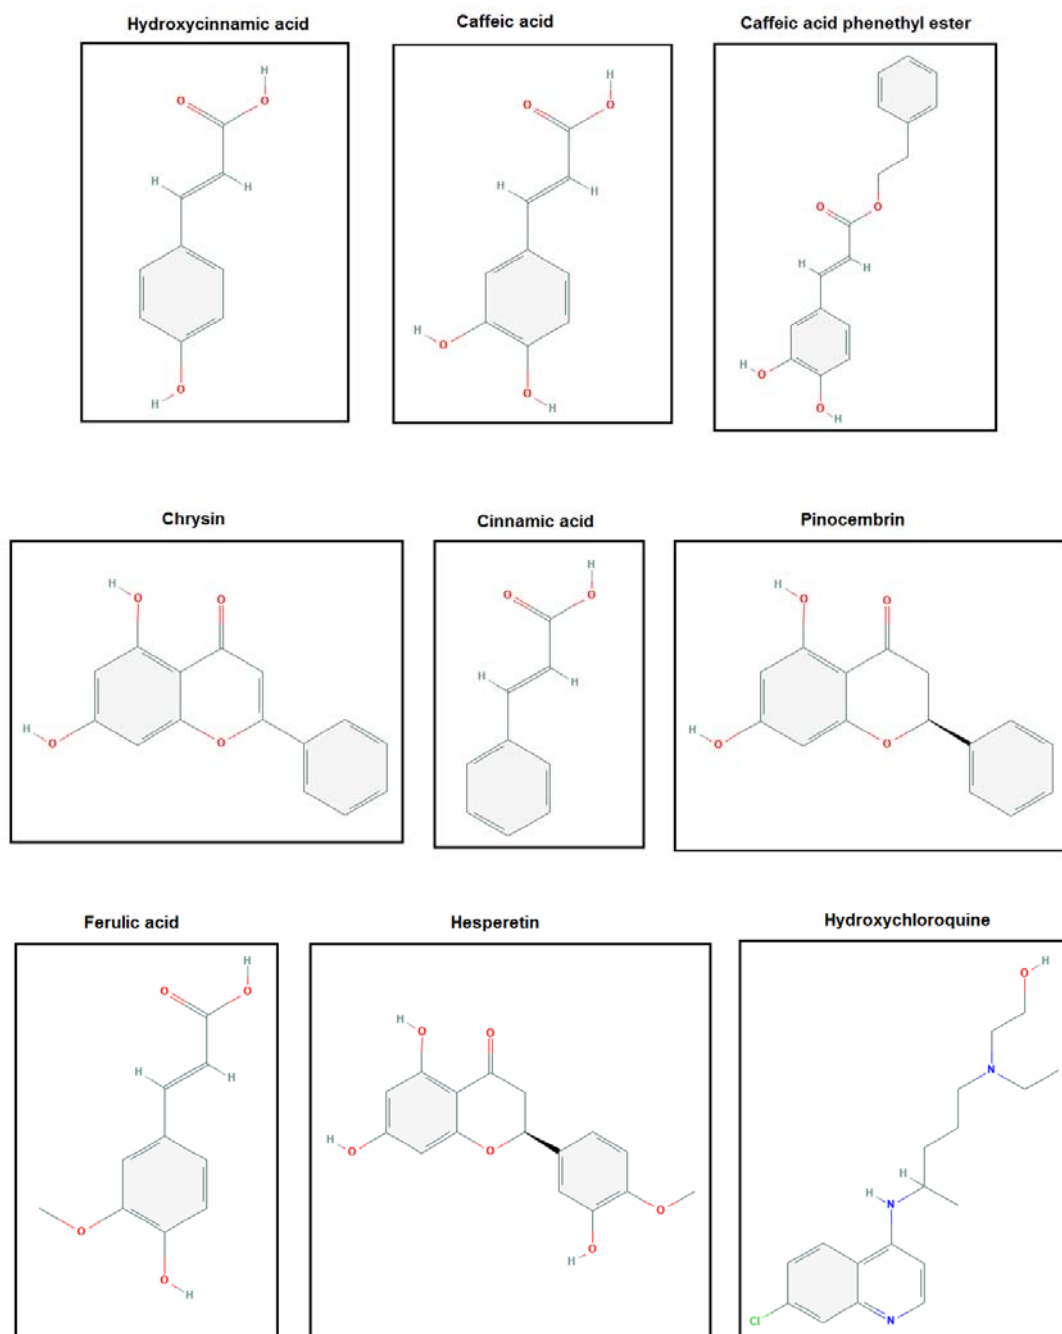

**Fig. 1.** 2-D structures of ligands used in the present study

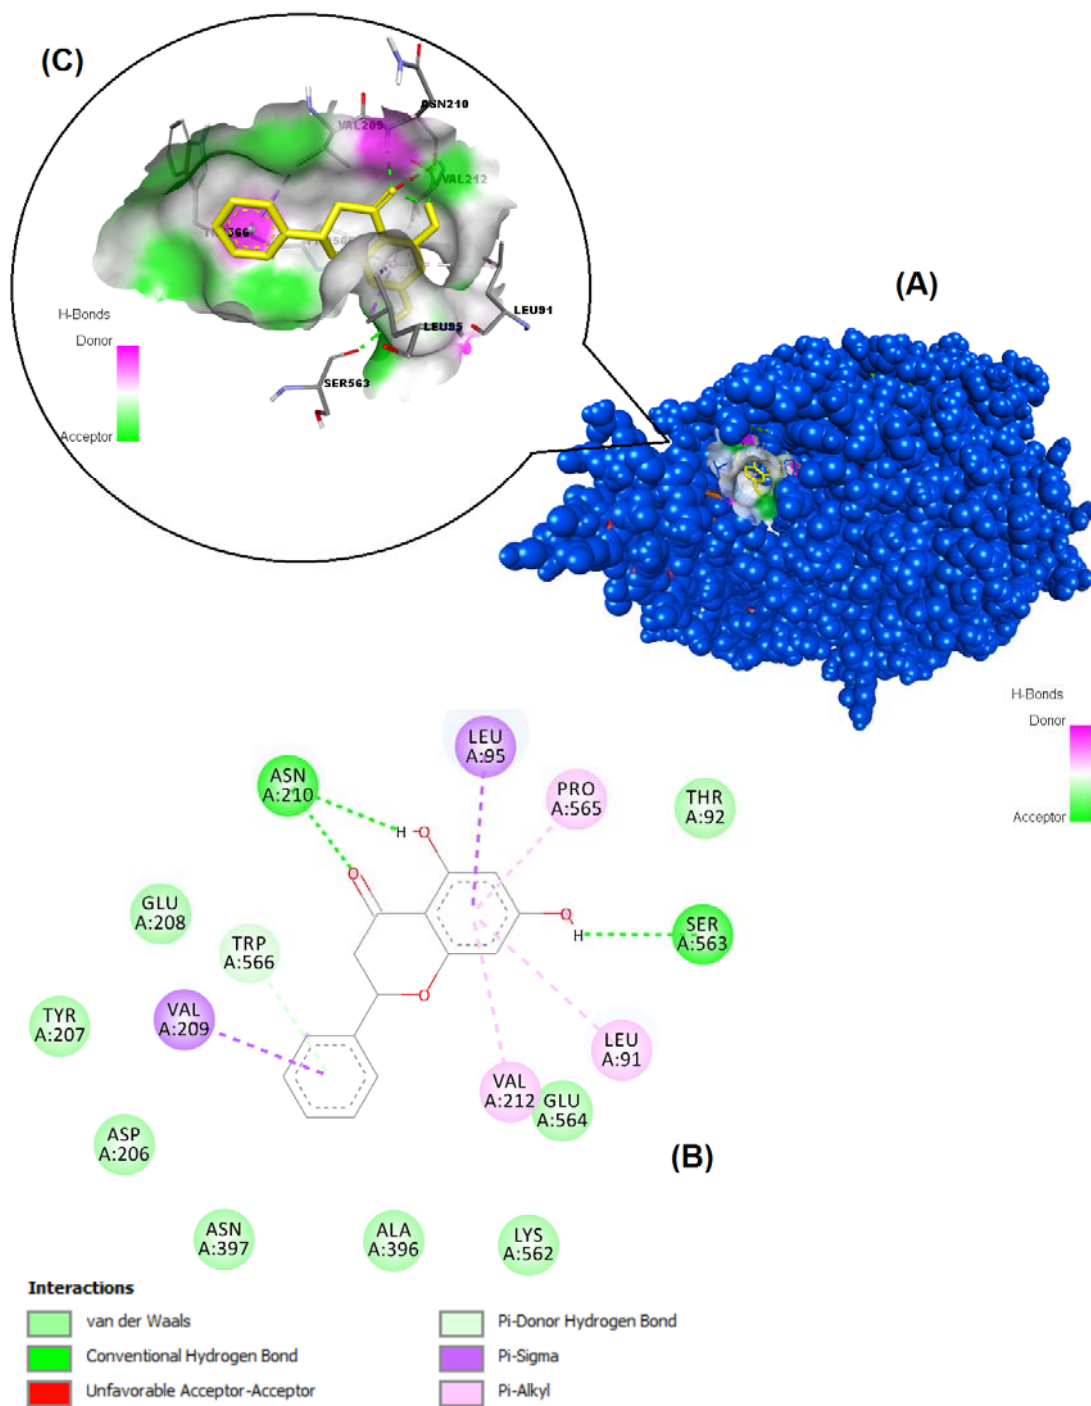

**Fig. 2.** Binding pose profile of pinocembrin in the target protein ACE2 (A), blue shaped molecule represents the receptor and yellow shaped molecule indicates the ligand. The two-dimension (2D) (B) and three-dimension (3D) (C) interactions analysis of ACE2 protein with compound pinocembrin.

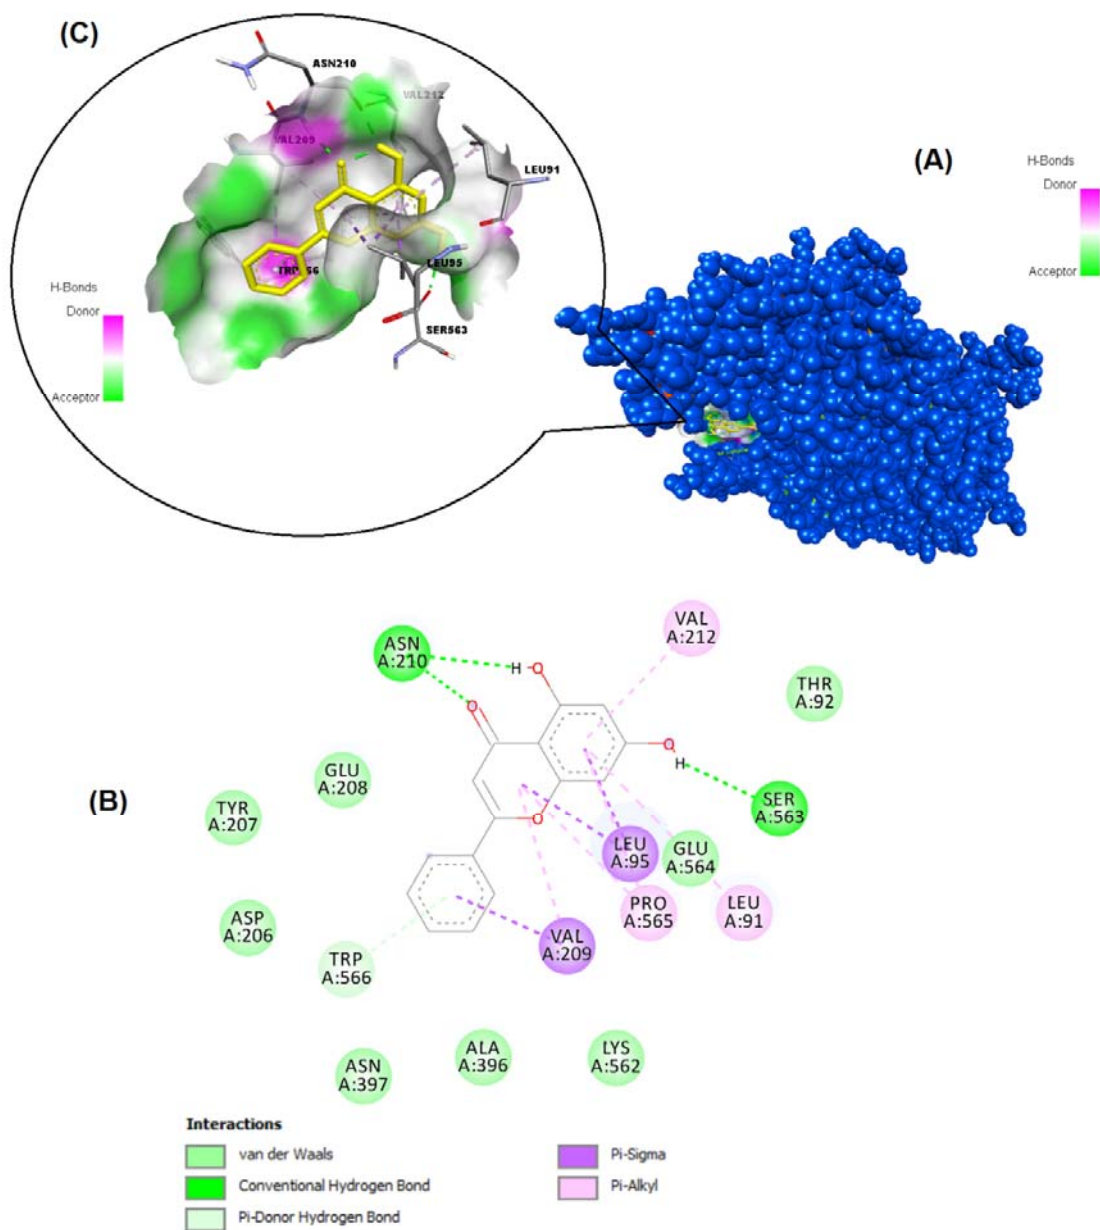

**Fig. 3.** Binding pose profile of chrysin in the target protein ACE2 (A), blue shaped molecule represents the receptor and yellow shaped molecule indicates the ligand. The two-dimension (2D) (B) and three-dimension (3D) (C) interactions analysis of ACE2 protein with compound chrysin.

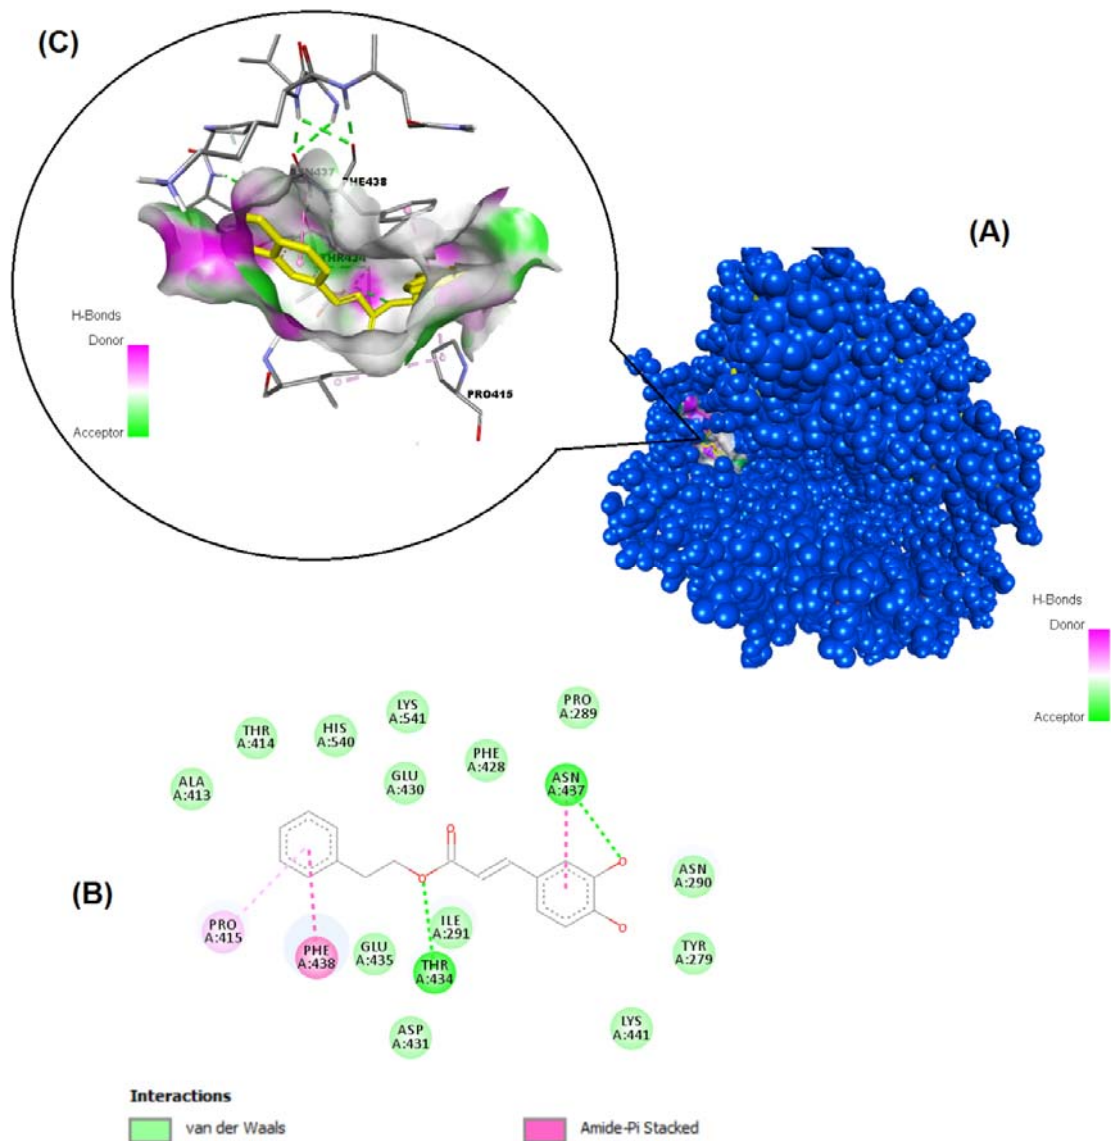

**Fig. 4.** Binding pose profile of CAPE in the target protein ACE2 (A), blue shaped molecule represents the receptor and yellow shaped molecule indicates the ligand. The two-dimension (2D) (B) and three-dimension (3D) (C) interactions analysis of ACE2 protein with compound CAPE.



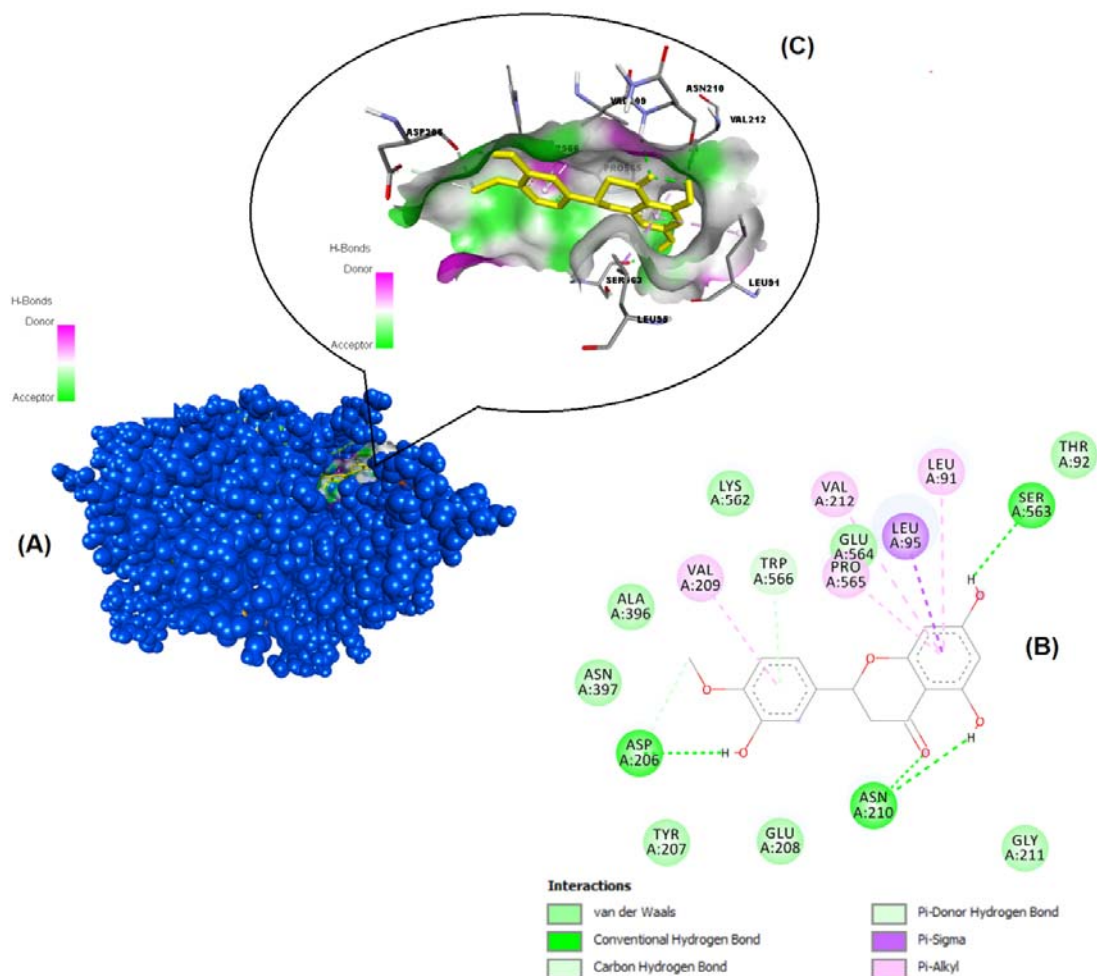

**Fig. 5.** Binding pose profile of hesperetin in the target protein ACE2 (A), blue shaped molecule represents the receptor and yellow shaped molecule indicates the ligand. The two-dimension (2D) (B) and three-dimension (3D) (C) interactions analysis of ACE2 protein with compound hesperetin.

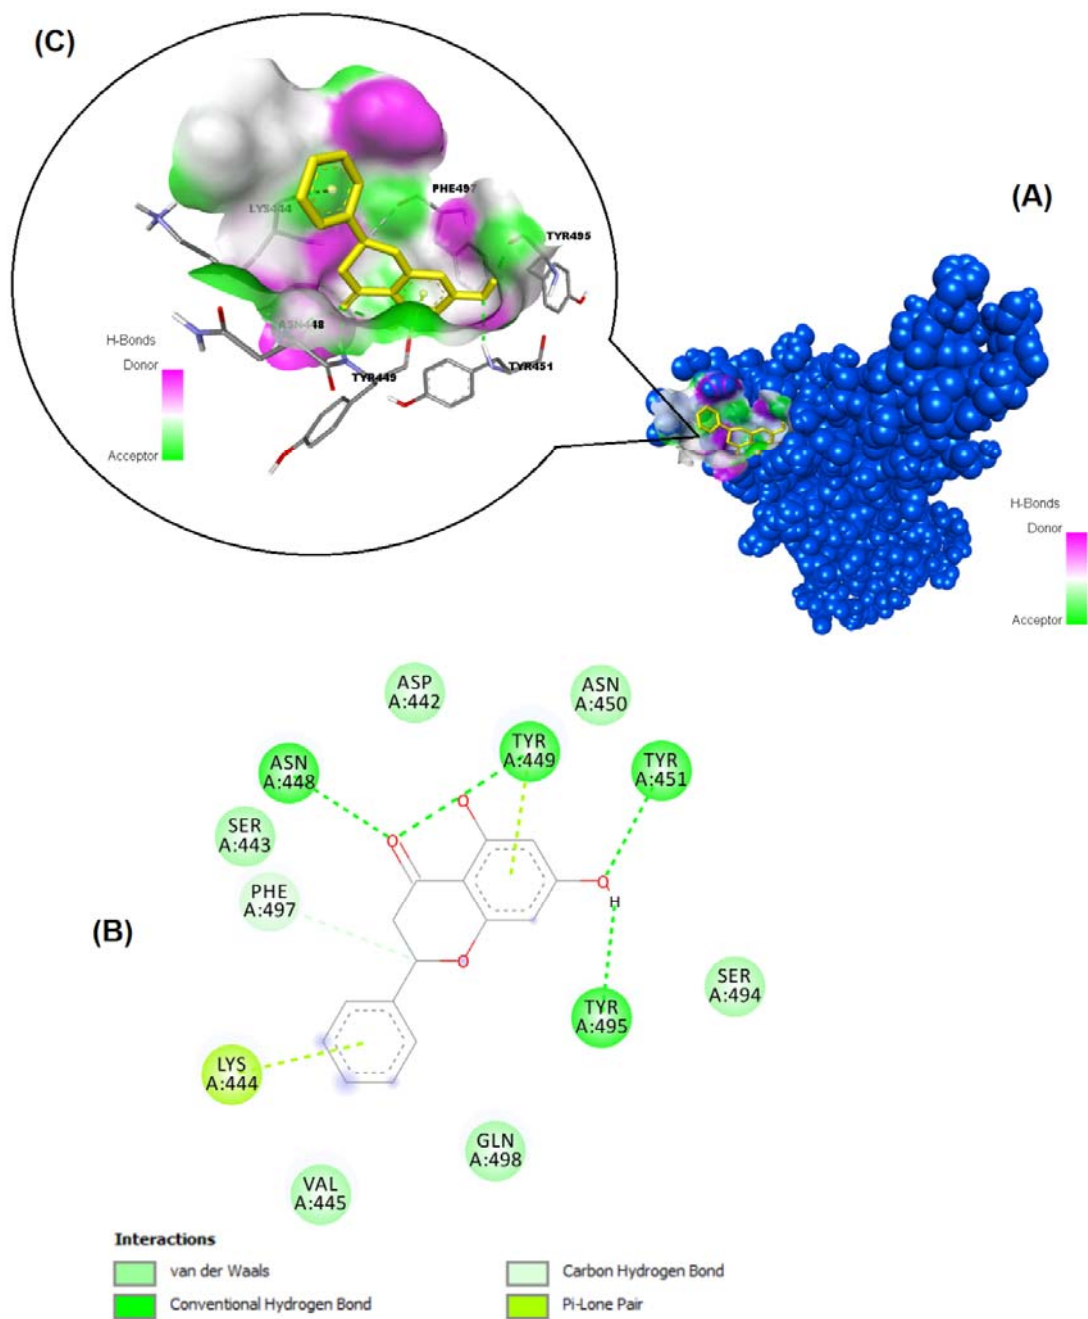

**Fig. 6.** Binding pose profile of pinocembrin in the SARS-CoV-2 Spike receptor binding domain (A), blue shaped molecule represents the receptor and yellow shaped molecule indicates the ligand. The two-dimension (2D) (B) and three-dimension (3D) (C) interactions analysis of SARS-CoV-2 Spike RBD with compound pinocembrin.

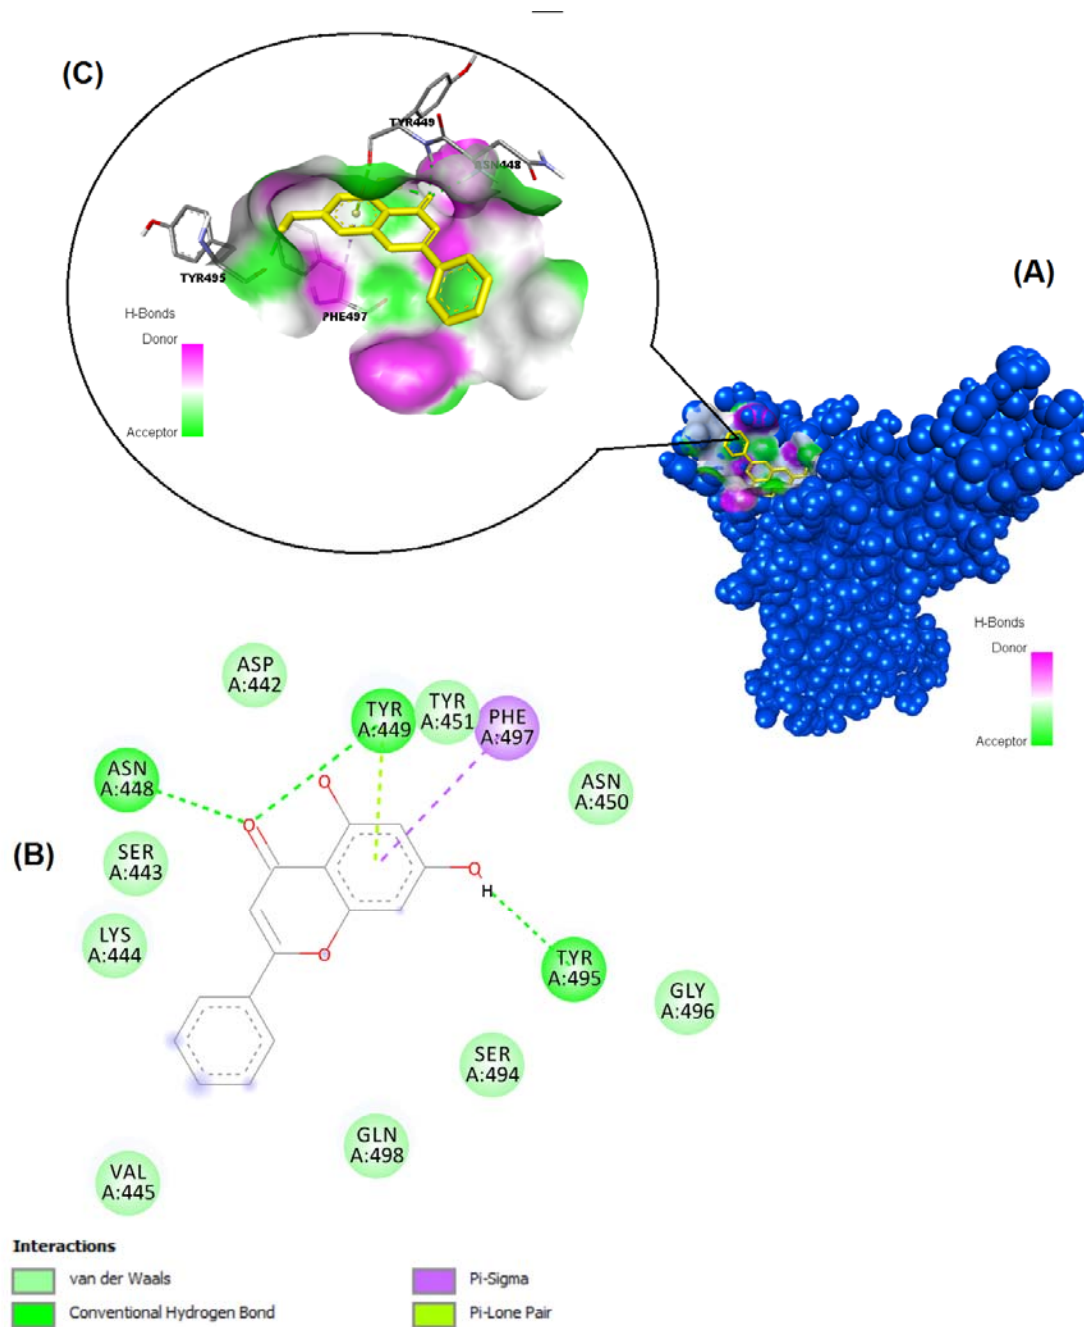

**Fig. 7.** Binding pose profile of chrysin in the SARS-CoV-2 Spike receptor binding domain (A), blue shaped molecule represents the receptor and yellow shaped molecule indicates the ligand. The two-dimension (2D) (B) and three-dimension (3D) (C) interactions analysis of SARS-CoV-2 Spike RBD with compound chrysin.

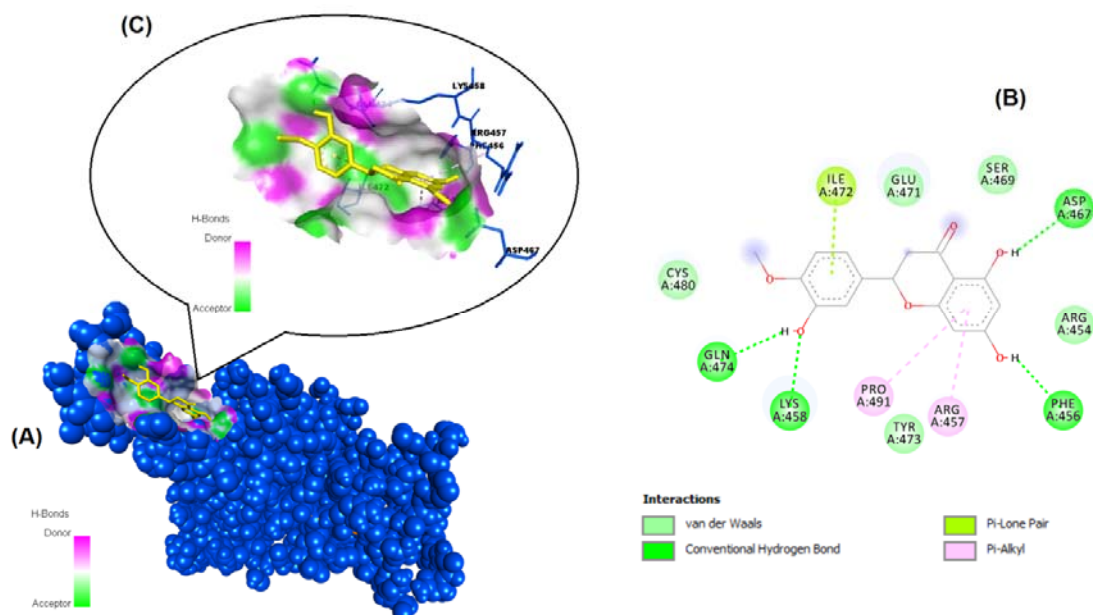

**Fig. 8.** Binding pose profile of hesperetin in the SARS-CoV-2 Spike receptor binding domain (A), blue shaped molecule represents the receptor and yellow shaped molecule indicates the ligand. The two-dimension (2D) (B) and three-dimension (3D) (C) interactions analysis of SARS-CoV-2 Spike RBD with compound hesperetin.

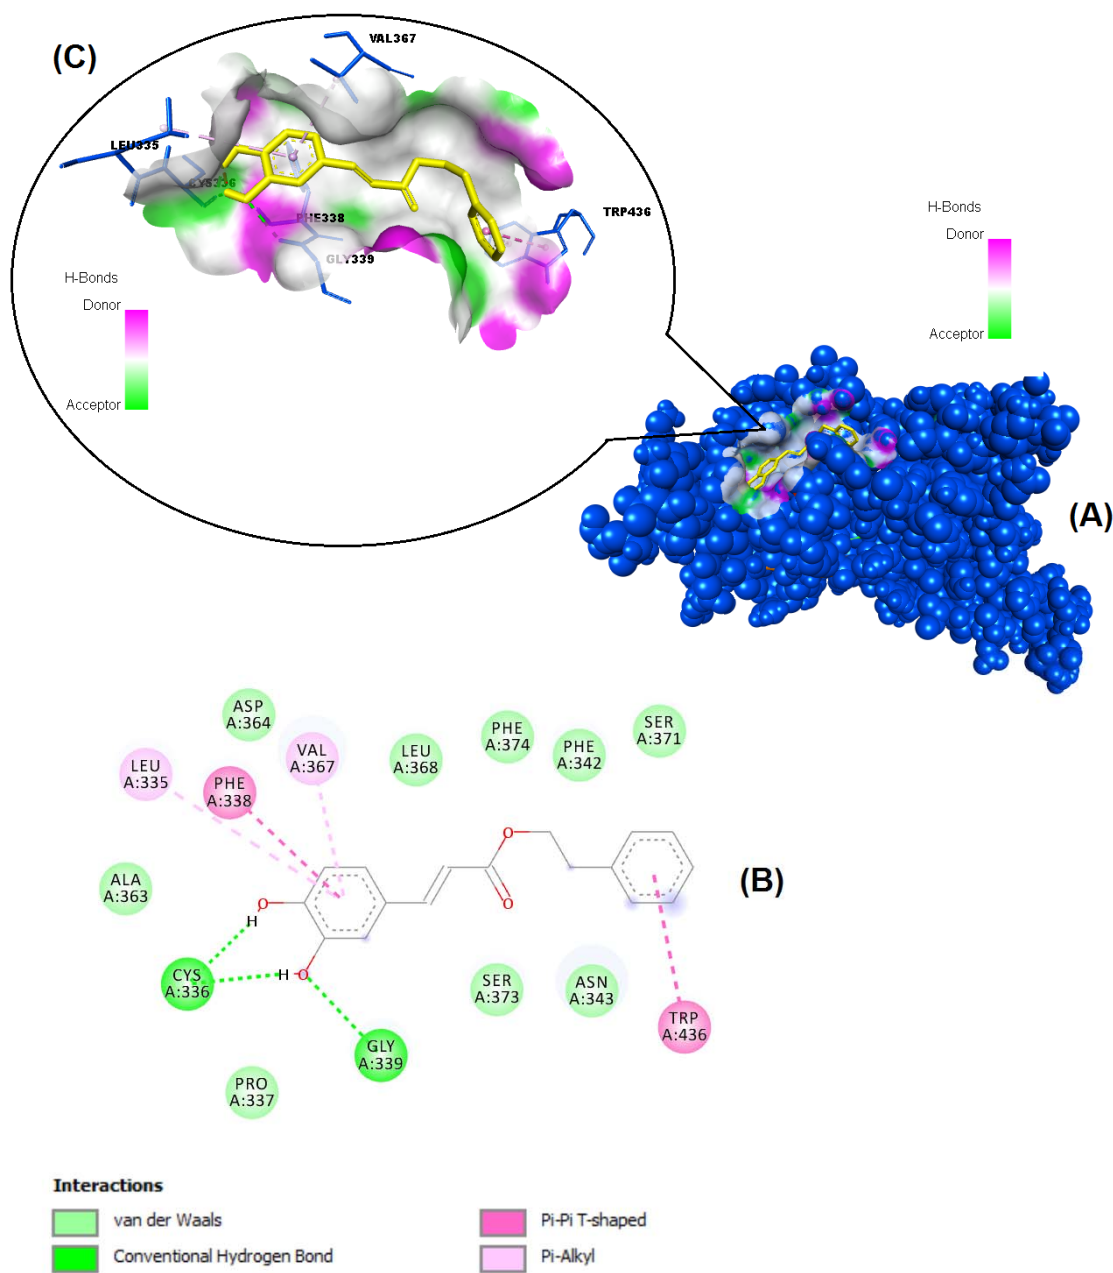

**Fig. 9.** Binding pose profile of CAPE in the SARS-CoV-2 Spike receptor binding domain (A), blue shaped molecule represents the receptor and yellow shaped molecule indicates the ligand. The two-dimension (2D) (B) and three-dimension (3D) (C) interactions analysis of SARS-CoV-2 Spike RBD with compound CAPE.

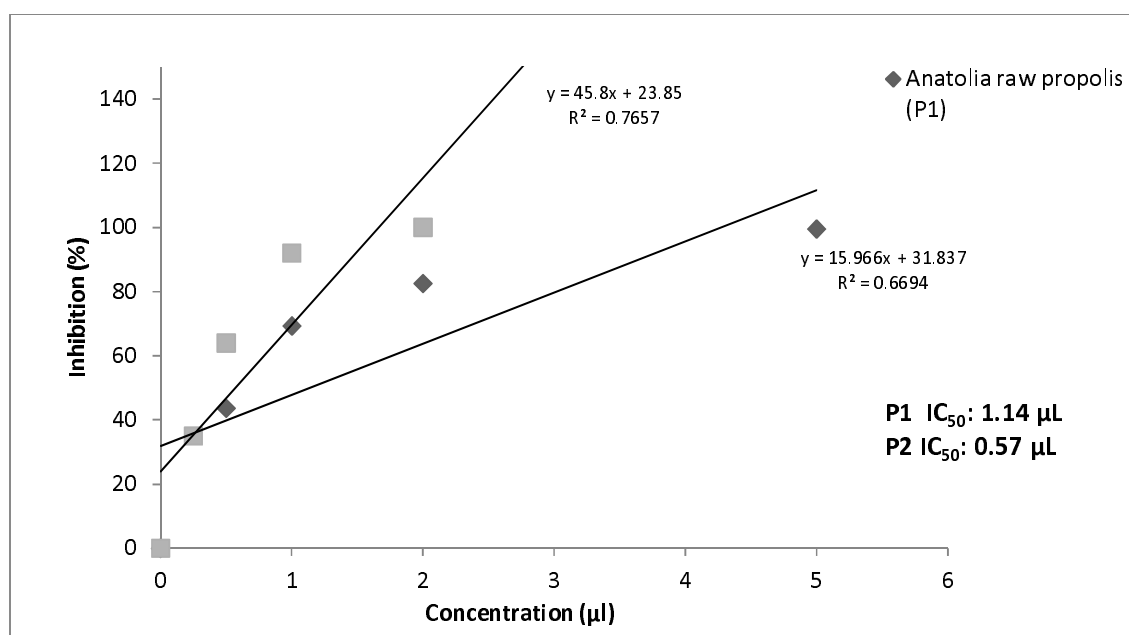

**Fig. 10.** IC<sub>50</sub> values of P1 and P2 samples

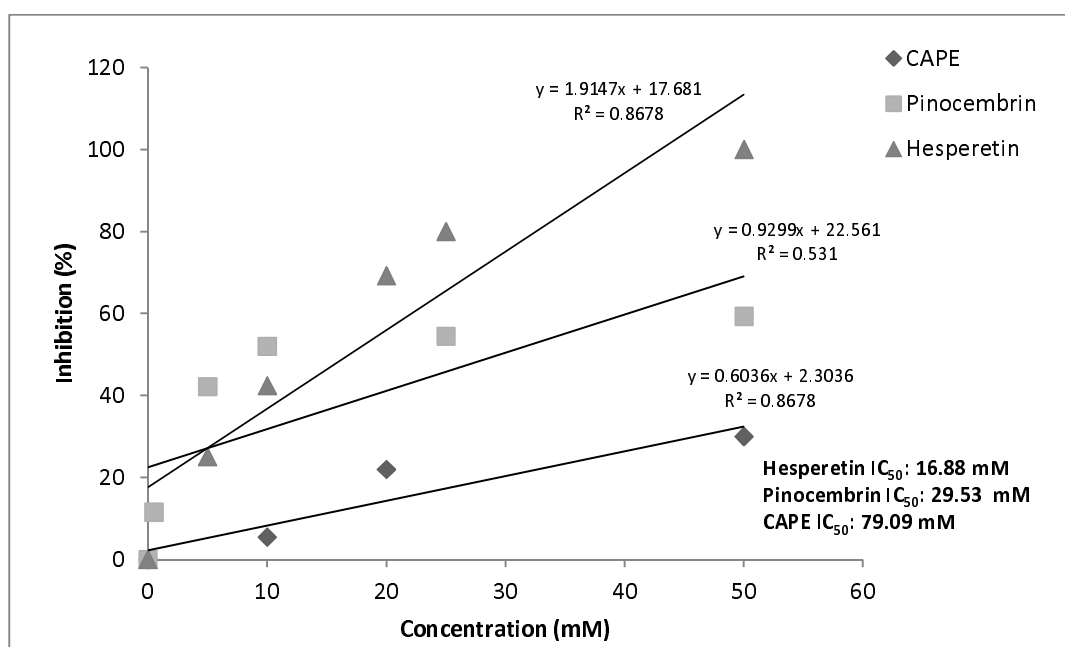

**Fig. 11.** IC<sub>50</sub> values of CAPE, pinocembrin and hesperetin
